# Supplementary material for: Understanding Foot Loading and Balance Behavior of Children with Motor Sensory Processing Disorder
Source: MDPI journal article supplement (doi:10.3390/children9030379), 2022-03-09
Supplement: s1 [file s1]

# Analysis of Task-based Plantar Loadings and Foot Balance in Children with Sensory Processing Disorders

Lin Yu <sup>1,2</sup>, Peimin Yu <sup>1,3,4</sup>, Wei Liu <sup>1,5</sup>, Zixiang Gao <sup>1,5</sup>, Dong Sun <sup>6,\*</sup>, Qichang Mei <sup>1,3,4,\*</sup>, Justin Fernandez <sup>1,3,4</sup> and Yaodong Gu <sup>1,3,4,\*</sup>

## Supplementary materials

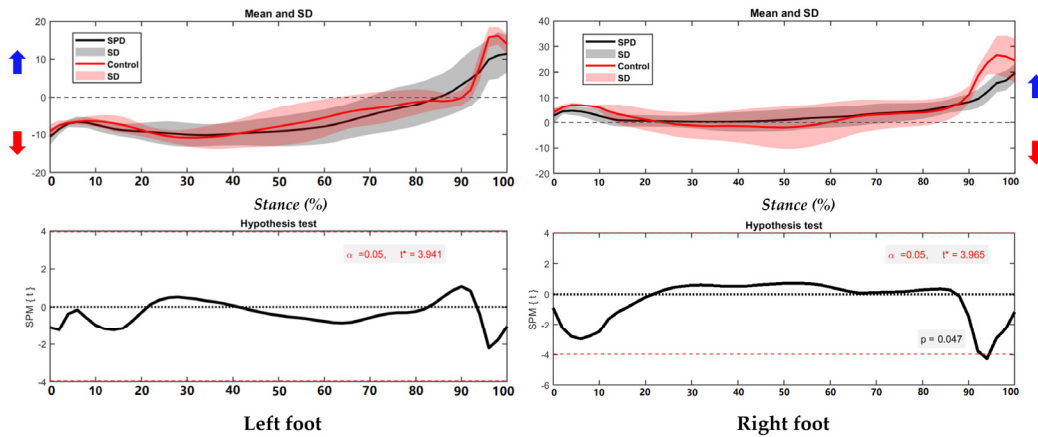

**Figure S1.** The COP of trajectory in the left foot and right foot during walking with highlighted direction of pronation (Blue arrow) and supination (Red arrow)

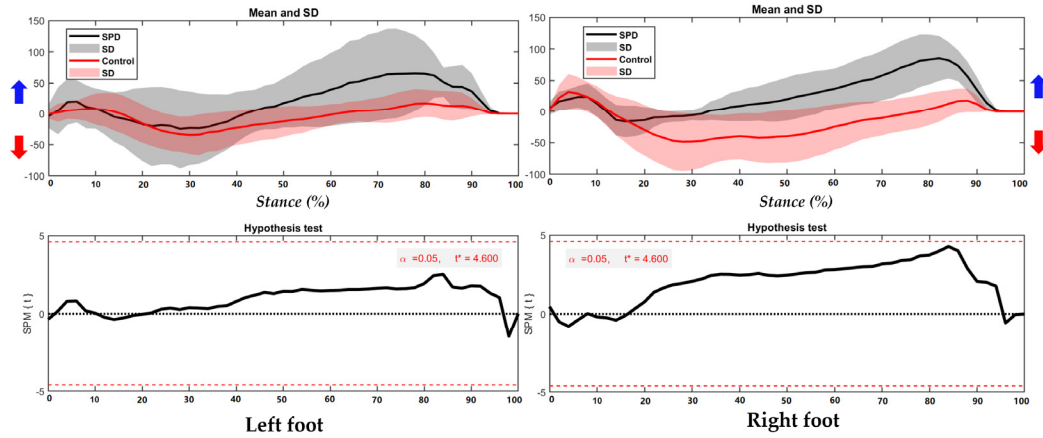

**Figure S2.** The foot balance index (FBI) in the left foot and right foot during walking with highlighted direction of pronation (Blue arrow) and supination (Red arrow)

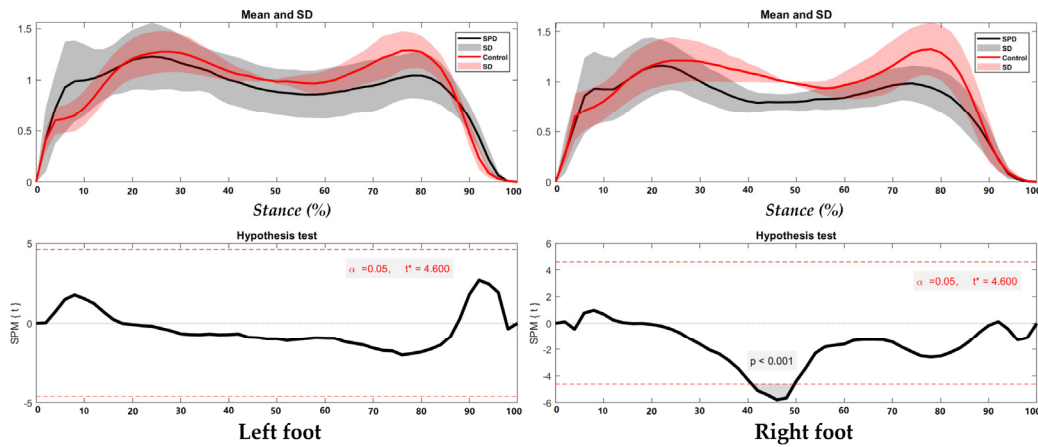

**Figure S3.** The vertical ground reaction force (GRF) in the left foot and right foot during walking in the SPD children and healthy controls

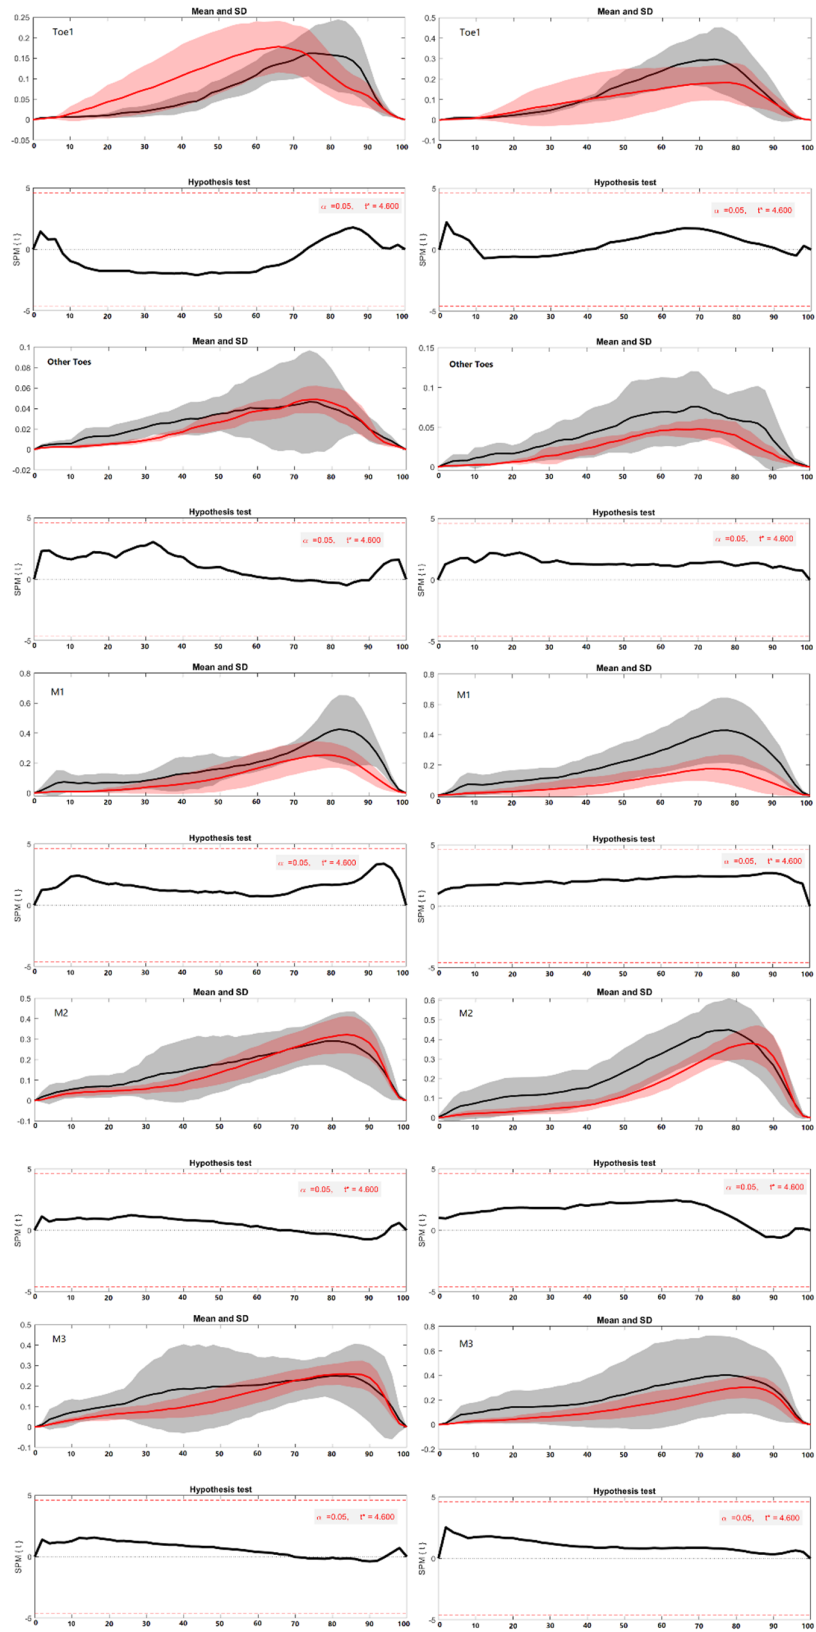

**Figure S4-1.** The regional plantar force in the left foot and right foot during walking in the SPD children and healthy controls

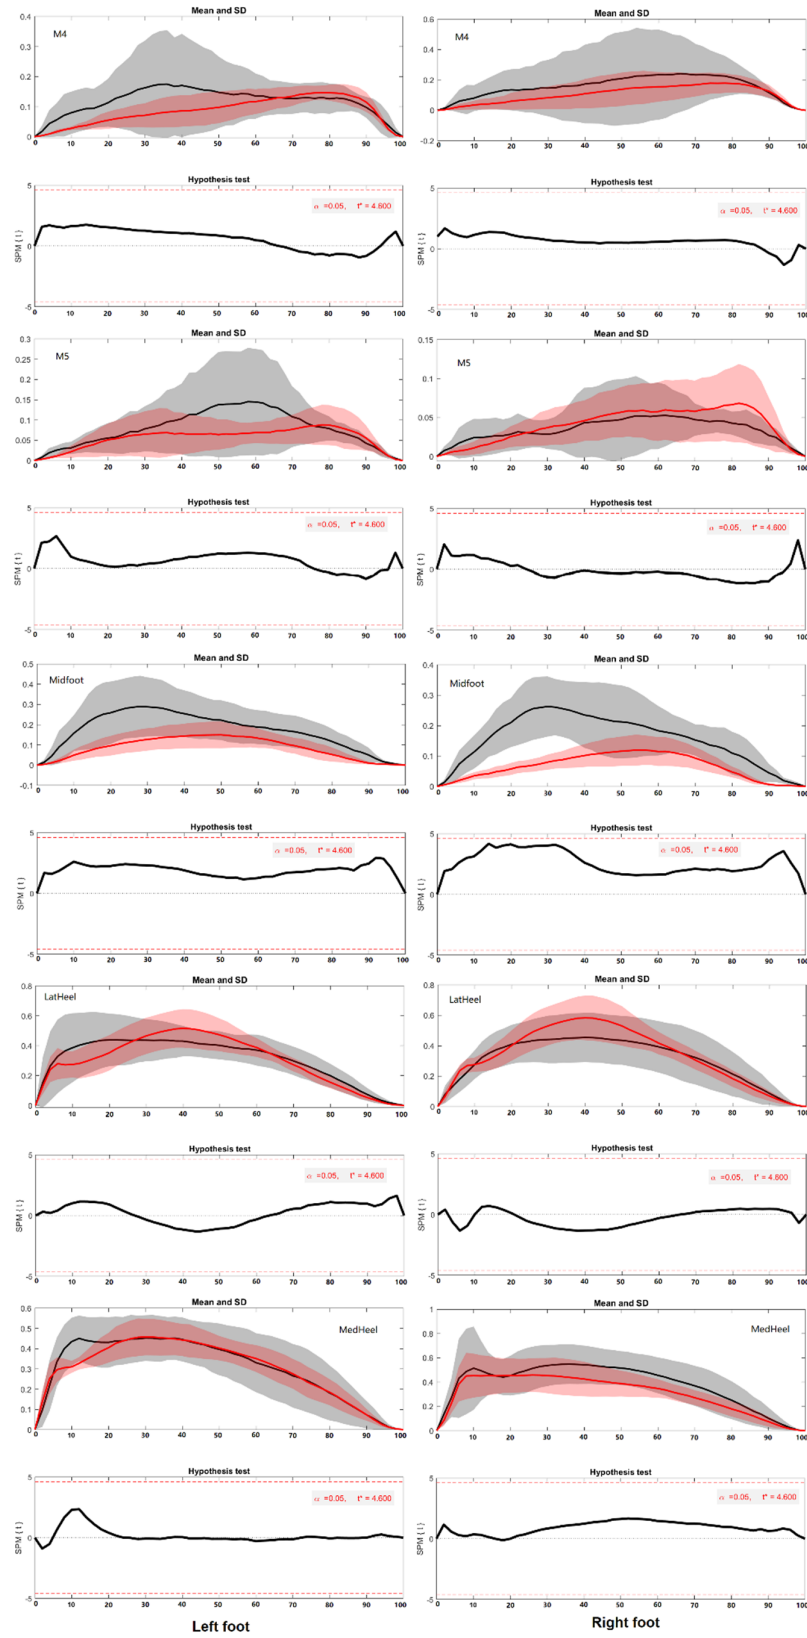

**Figure S4-2.** The regional plantar force in the left foot and right foot during walking in the SPD children and healthy controls
